# Supplementary material
Source: Springer Nature journal article supplement (https://www.springermedizin.de/resource/supplementary/13045_2011_188_MOESM4_ESM.pdf/9660832)

A.

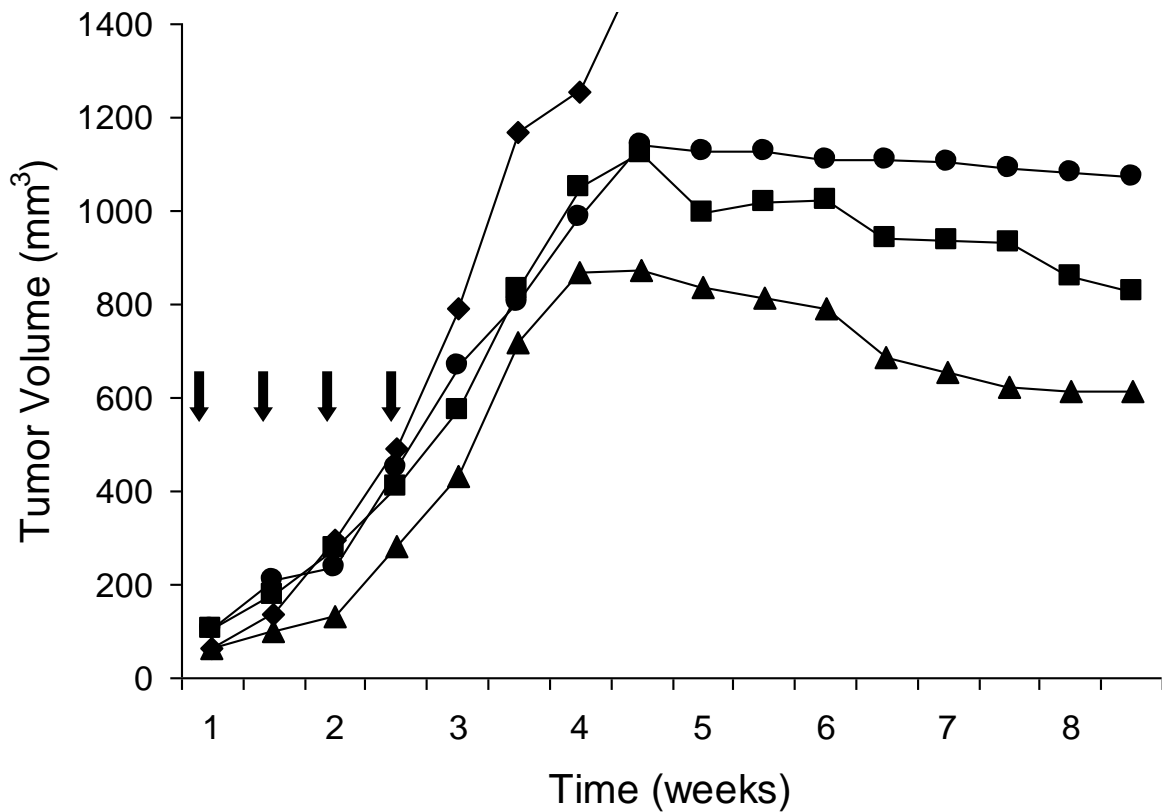

B.

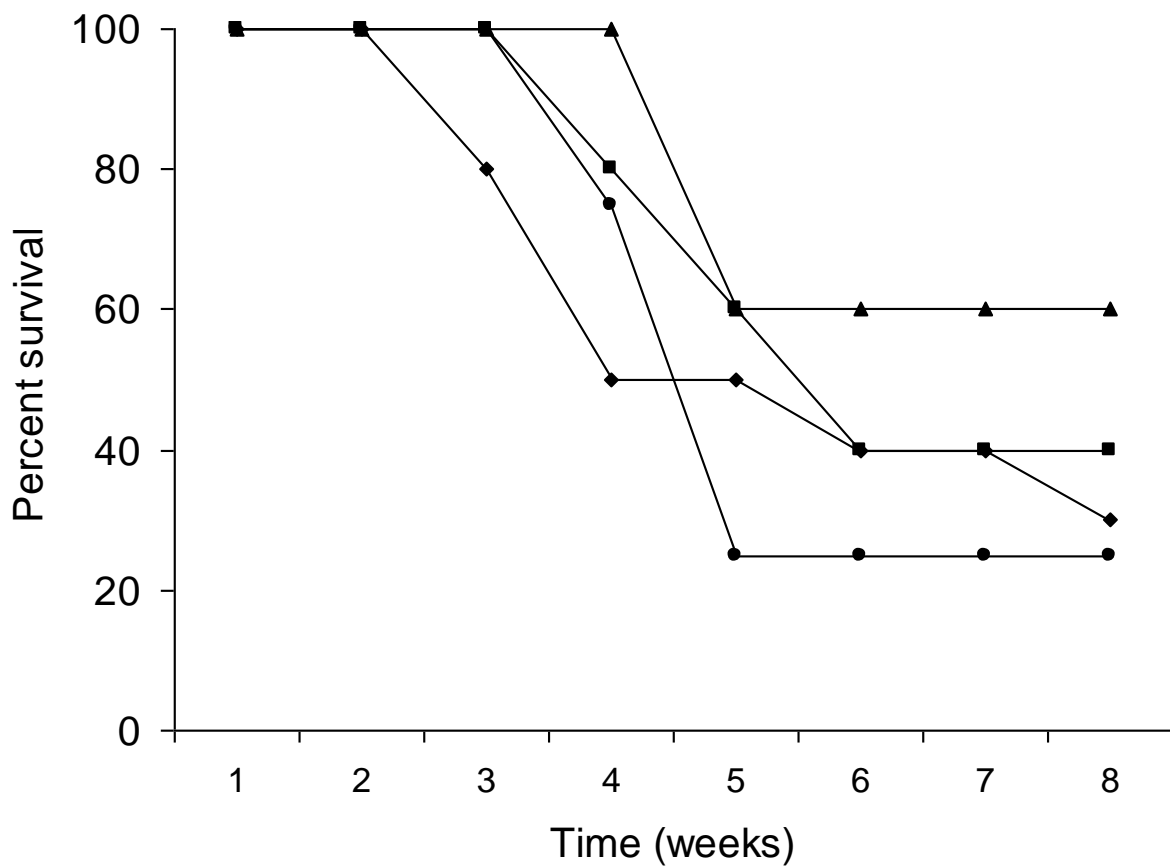

Supplement: MOESM4 [file 9660832]
